# Supplementary material
Source: HighWire-hosted journal article supplement (https://ep.bmj.com/content/105/6/326)
Supplement: inline-supplementary-material-1 [file inline-supplementary-material-1.pdf]

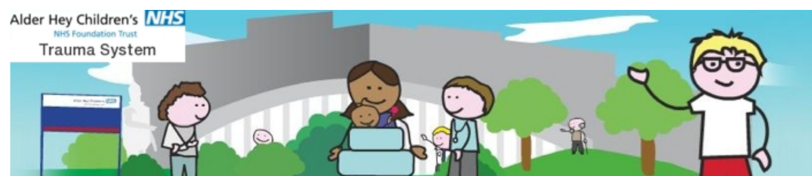

## Alder Hey Trauma System Trauma Team Activation

**To activate Trauma Team call Switchboard phone 2222**  
**Specify “Major Trauma, Trauma Team to [location]”**

### Activation Criteria:

- (1) On receipt of Major Trauma pre-alert from NWS or Trauma Unit:**  
**OR**  
**(2) Self presentation with, or later development of:**

#### *Anatomical triggers*

Unmanageable airway (not protecting own)  
 Unsupportable inadequate breathing  
 Unstoppable haemorrhage (not controlled by simple pressure)

#### *Physiological triggers*

GCS 12 or less  
 Abnormal physiology: (*guide values*)

| Age                 | Heart Rate<br>beats/min |             | Respiratory Rate<br>breaths/min | Systolic BP<br>mmHg |
|---------------------|-------------------------|-------------|---------------------------------|---------------------|
|                     | Tachycardia             | Bradycardia |                                 |                     |
| 0-7 days            | >180                    | <100        | <30 or >60                      | <60                 |
| 7-28 days           | >180                    | <100        | <30 or >60                      | <80                 |
| 1 month –<br>1 year | >180                    | <90         | <30 or >40                      | <75                 |
| 2-5 years           | >140                    | <60         | <25 or >30                      | <75                 |
| 6-12 years          | >130                    | <60         | <20 or >25                      | <85                 |
| >12 years           | >110                    | <60         | <15 or >20                      | <90                 |

#### *Clinical signs triggers*

Flail chest  
 Penetrating trauma to head, neck, trunk, or limbs proximal to elbow or knees  
 Fractures of 2 or more long bones (humerus/femur/tibia) or fractured pelvis  
 Amputation proximal to wrist or ankle  
 Crushed, mangled or degloved extremities  
 New onset sensory or motor deficits (whole limb or partial)  
 Rigid abdomen  
 Severe burns >20%

#### *Mechanism of injury triggers*

Falls over 3 times patient's own height  
 Entrapment  
 Complete or partial ejection from a motor vehicle  
 Death in the same passenger compartment

B Mehta, K Williams, B Stewart

Active date: 1 July 2012

Review date: 1 April 2013



## Alder Hey Trauma System Trauma Team Activation

### Other triggers

Significant comorbidities  
Pregnancy of 20 or more weeks  
Other clinician concern

### Trauma Team Activation Algorithm

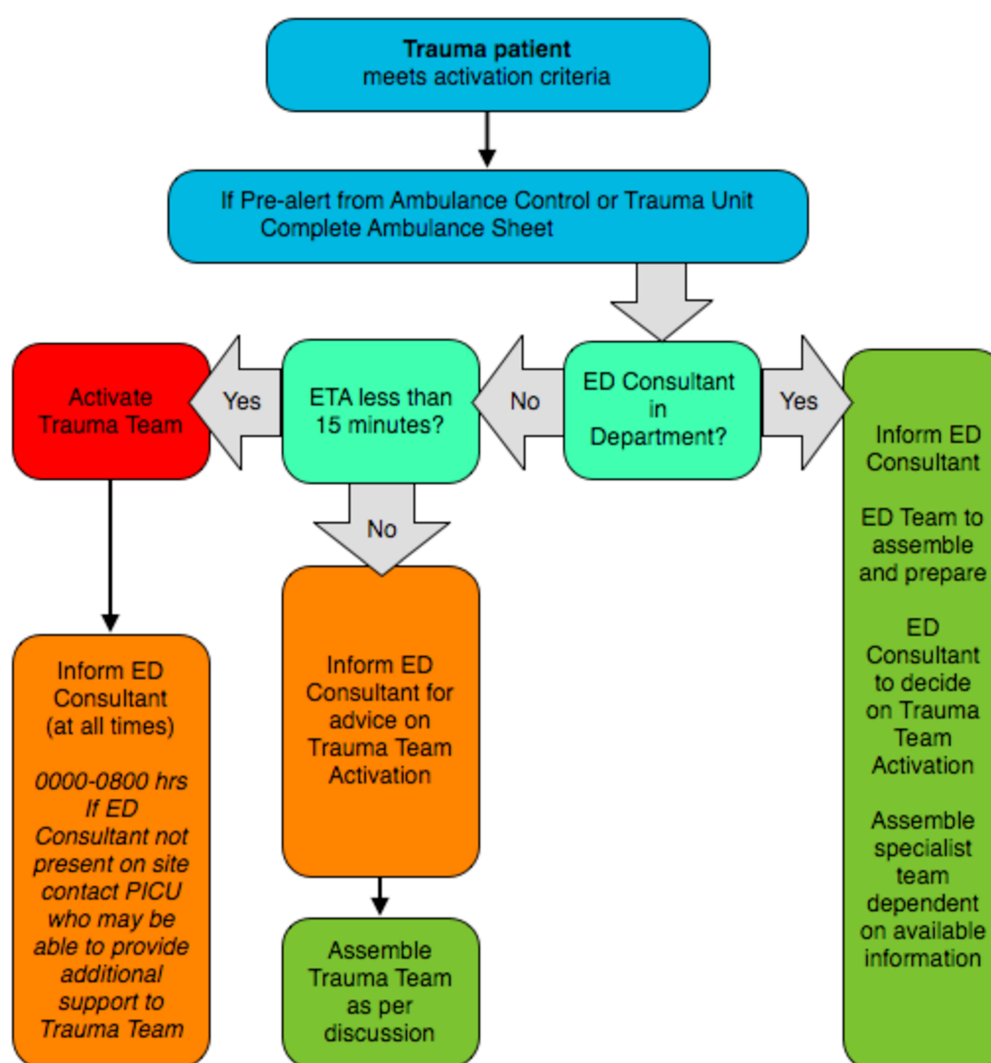

B Mehta, K Williams, B Stewart

Active date: 1 July 2012

Review date: 1 April 2013
